# Supplementary material for: Association of Advance Care Planning Visits With Intensity of Health Care for Medicare Beneficiaries With Serious Illness at the End of Life
Source: PubMed Central journal article supplement (PMC8796875; doi:10.1001/jamahealthforum.2021.1829), 2021-07-30

## Supplementary Online Content

Weissman JS, Reich AJ, Prigerson HG, et al. Association of advance care planning visits with intensity of health care for Medicare beneficiaries with serious illness at the end of life. *JAMA Health Forum*. 2021;2(7):e211829.  
doi:10.1001/jamahealthforum.2021.1829

**eTable 1.** Association Between ACP and Hospital Death

**eTable 2.** Association Between ACP and Inpatient Admission in the Last 30 Days of Life

**eTable 3.** Association Between ACP and ICU Admission in the Last 30 Days of Life

**eTable 4.** Association Between ACP and Emergency Department Use in the Last 30 Days of Life

**eTable 5.** Association Between ACP and Late Hospice Enrollment

**eTable 6.** Association Between ACP and Early Hospice Enrollment

**eTable 7.** Association Between ACP and Expenditure in the Last 30 Days of Life by HRR Median Medicare Spending Level

**eTable 8.** Health Care Utilization at the End of Life by FFS Medicare Beneficiaries in SI Cohort Who Died in 2017 or 2018

**eTable 9.** Adjusted Odds Ratios for Healthcare Utilization in Last 30 Days of Life Using 1:1 Propensity Score Matched–Beneficiaries

**eFigure.** Overlap of Propensity Scores in Seriously Ill Patients Before Matching

This supplementary material has been provided by the authors to give readers additional information about their work.

| <b>eTable 1. Association Between ACP and Hospital Death</b> |           |               |       |                |
|-------------------------------------------------------------|-----------|---------------|-------|----------------|
|                                                             | <b>OR</b> | <b>95% CI</b> |       | <b>P value</b> |
| <b>ACP</b>                                                  |           |               |       |                |
| <i>No ACP</i>                                               | ref       |               |       |                |
| <i>ACP &gt;30d before death</i>                             | 0.854     | 0.839         | 0.87  | <0.0001        |
| <i>ACP in last 30d</i>                                      | 1.221     | 1.186         | 1.258 | <0.0001        |
| <b>Age</b>                                                  |           |               |       |                |
| <i>65-69</i>                                                | ref       |               |       |                |
| <i>70-74</i>                                                | 0.904     | 0.886         | 0.922 | <0.0001        |
| <i>75-79</i>                                                | 0.828     | 0.812         | 0.844 | <0.0001        |
| <i>80-84</i>                                                | 0.685     | 0.672         | 0.698 | <0.0001        |
| <i>85-89</i>                                                | 0.559     | 0.548         | 0.57  | <0.0001        |
| <i>90-94</i>                                                | 0.448     | 0.439         | 0.457 | <0.0001        |
| <i>95+</i>                                                  | 0.364     | 0.355         | 0.373 | <0.0001        |
| <b>Race</b>                                                 |           |               |       |                |
| <i>Non-Hispanic White</i>                                   | ref       |               |       |                |
| <i>Asian</i>                                                | 2.071     | 1.994         | 2.152 | <0.0001        |
| <i>Hispanic</i>                                             | 1.598     | 1.54          | 1.658 | <0.0001        |
| <i>Non-Hispanic Black</i>                                   | 1.346     | 1.325         | 1.368 | <0.0001        |
| <i>Other</i>                                                | 1.534     | 1.481         | 1.589 | <0.0001        |
| <i>Unknown</i>                                              | 1.181     | 1.094         | 1.274 | <0.0001        |
| <b>Sex</b>                                                  |           |               |       |                |
| <i>Male</i>                                                 | ref       |               |       |                |
| <i>Female</i>                                               | 0.99      | 0.981         | 1     | 0.0562         |
| <b>Charlson Comorbidity Score</b>                           |           |               |       |                |
| <i>0</i>                                                    | ref       |               |       |                |
| <i>1</i>                                                    | 1.529     | 1.408         | 1.661 | <0.0001        |
| <i>2</i>                                                    | 2.205     | 2.037         | 2.387 | <0.0001        |
| <i>3</i>                                                    | 3.06      | 2.83          | 3.309 | <0.0001        |
| <i>4</i>                                                    | 3.815     | 3.529         | 4.124 | <0.0001        |
| <i>5+</i>                                                   | 5.179     | 4.798         | 5.59  | <0.0001        |
| <b>HRR Median Medicare Spending Level</b>                   |           |               |       |                |
| <i>Medium</i>                                               | ref       |               |       |                |
| <i>Low</i>                                                  | 1.169     | 1.156         | 1.182 | <0.0001        |
| <i>High</i>                                                 | 1.042     | 1.027         | 1.057 | <0.0001        |
| <b>Dual Eligibility Status</b>                              |           |               |       |                |
| <i>No</i>                                                   | ref       |               |       |                |
| <i>Yes</i>                                                  | 0.85      | 0.841         | 0.859 | <0.0001        |

**eTable 2. Association Between ACP and Inpatient Admission in the Last 30 Days of Life**

|                                           | <b>OR</b> | <b>95% CI</b> |        | <b>P value</b> |
|-------------------------------------------|-----------|---------------|--------|----------------|
| <b>ACP</b>                                |           |               |        |                |
| <i>No ACP</i>                             | ref       |               |        |                |
| <i>ACP &gt;30d before death</i>           | 0.84      | 0.827         | 0.853  | <0.0001        |
| <i>ACP in last 30d</i>                    | 5.275     | 5.069         | 5.49   | <0.0001        |
| <b>Age</b>                                |           |               |        |                |
| <i>65-69</i>                              | ref       |               |        |                |
| <i>70-74</i>                              | 0.956     | 0.937         | 0.975  | <0.0001        |
| <i>75-79</i>                              | 0.9       | 0.883         | 0.918  | <0.0001        |
| <i>80-84</i>                              | 0.79      | 0.775         | 0.805  | <0.0001        |
| <i>85-89</i>                              | 0.682     | 0.67          | 0.695  | <0.0001        |
| <i>90-94</i>                              | 0.582     | 0.571         | 0.593  | <0.0001        |
| <i>95+</i>                                | 0.484     | 0.474         | 0.494  | <0.0001        |
| <b>Race</b>                               |           |               |        |                |
| <i>Non-Hispanic White</i>                 | ref       |               |        |                |
| <i>Asian</i>                              | 1.619     | 1.558         | 1.683  | <0.0001        |
| <i>Hispanic</i>                           | 1.49      | 1.438         | 1.545  | <0.0001        |
| <i>Non-Hispanic Black</i>                 | 1.275     | 1.256         | 1.295  | <0.0001        |
| <i>Other</i>                              | 1.339     | 1.293         | 1.387  | <0.0001        |
| <i>Unknown</i>                            | 1.078     | 1             | 1.161  | 0.0488         |
| <b>Sex</b>                                |           |               |        |                |
| <i>Male</i>                               | ref       |               |        |                |
| <i>Female</i>                             | 1.011     | 1.002         | 1.02   | 0.0123         |
| <b>Charlson Comorbidity Score</b>         |           |               |        |                |
| <i>0</i>                                  | ref       |               |        |                |
| <i>1</i>                                  | 2.114     | 1.981         | 2.256  | <0.0001        |
| <i>2</i>                                  | 3.41      | 3.203         | 3.631  | <0.0001        |
| <i>3</i>                                  | 5.158     | 4.847         | 5.489  | <0.0001        |
| <i>4</i>                                  | 7.14      | 6.711         | 7.597  | <0.0001        |
| <i>5+</i>                                 | 13.36     | 12.571        | 14.198 | <0.0001        |
| <b>HRR Median Medicare Spending Level</b> |           |               |        |                |
| <i>Medium</i>                             | ref       |               |        |                |
| <i>Low</i>                                | 1.209     | 1.198         | 1.221  | <0.0001        |
| <i>High</i>                               | 0.901     | 0.89          | 0.913  | <0.0001        |
| <b>Dual Eligibility Status</b>            |           |               |        |                |
| <i>No</i>                                 | ref       |               |        |                |
| <i>Yes</i>                                | 0.773     | 0.766         | 0.781  | <0.0001        |

| <b>eTable 3. Association Between ACP and ICU Admission in the Last 30 Days of Life</b> |           |               |       |                |
|----------------------------------------------------------------------------------------|-----------|---------------|-------|----------------|
|                                                                                        | <b>OR</b> | <b>95% CI</b> |       | <b>P value</b> |
| <b>ACP</b>                                                                             |           |               |       |                |
| <i>No ACP</i>                                                                          | ref       |               |       |                |
| <i>ACP &gt;30d before death</i>                                                        | 0.866     | 0.849         | 0.882 | <0.0001        |
| <i>ACP in last 30d</i>                                                                 | 1.57      | 1.525         | 1.617 | <0.0001        |
| <b>Age</b>                                                                             |           |               |       |                |
| <i>65-69</i>                                                                           | ref       |               |       |                |
| <i>70-74</i>                                                                           | 0.891     | 0.873         | 0.909 | <0.0001        |
| <i>75-79</i>                                                                           | 0.776     | 0.76          | 0.791 | <0.0001        |
| <i>80-84</i>                                                                           | 0.604     | 0.592         | 0.616 | <0.0001        |
| <i>85-89</i>                                                                           | 0.455     | 0.446         | 0.464 | <0.0001        |
| <i>90-94</i>                                                                           | 0.309     | 0.302         | 0.315 | <0.0001        |
| <i>95+</i>                                                                             | 0.207     | 0.201         | 0.214 | <0.0001        |
| <b>Race</b>                                                                            |           |               |       |                |
| <i>Non-Hispanic White</i>                                                              | ref       |               |       |                |
| <i>Asian</i>                                                                           | 1.809     | 1.736         | 1.885 | <0.0001        |
| <i>Hispanic</i>                                                                        | 1.617     | 1.555         | 1.681 | <0.0001        |
| <i>Non-Hispanic Black</i>                                                              | 1.319     | 1.297         | 1.341 | <0.0001        |
| <i>Other</i>                                                                           | 1.328     | 1.278         | 1.379 | <0.0001        |
| <i>Unknown</i>                                                                         | 1.078     | 0.995         | 1.167 | 0.0647         |
| <b>Sex</b>                                                                             |           |               |       |                |
| <i>Male</i>                                                                            | ref       |               |       |                |
| <i>Female</i>                                                                          | 0.974     | 0.964         | 0.985 | <0.0001        |
| <b>Charlson Comorbidity Score</b>                                                      |           |               |       |                |
| <i>0</i>                                                                               | ref       |               |       |                |
| <i>1</i>                                                                               | 1.689     | 1.524         | 1.871 | <0.0001        |
| <i>2</i>                                                                               | 2.622     | 2.376         | 2.893 | <0.0001        |
| <i>3</i>                                                                               | 3.716     | 3.372         | 4.095 | <0.0001        |
| <i>4</i>                                                                               | 4.838     | 4.393         | 5.328 | <0.0001        |
| <i>5+</i>                                                                              | 6.989     | 6.354         | 7.687 | <0.0001        |
| <b>HRR Median Medicare Spending Level</b>                                              |           |               |       |                |
| <i>Medium</i>                                                                          | ref       |               |       |                |
| <i>Low</i>                                                                             | 1.258     | 1.244         | 1.273 | <0.0001        |
| <i>High</i>                                                                            | 0.842     | 0.828         | 0.855 | <0.0001        |
| <b>Dual Eligibility Status</b>                                                         |           |               |       |                |
| <i>No</i>                                                                              | ref       |               |       |                |
| <i>Yes</i>                                                                             | 0.88      | 0.87          | 0.891 | <0.0001        |

| <b>eTable 4. Association Between ACP and Emergency Department Use in the Last 30 Days of Life</b> |           |               |       |                |
|---------------------------------------------------------------------------------------------------|-----------|---------------|-------|----------------|
|                                                                                                   | <b>OR</b> | <b>95% CI</b> |       | <b>P value</b> |
| <b>ACP</b>                                                                                        |           |               |       |                |
| <i>No ACP</i>                                                                                     | ref       |               |       |                |
| <i>ACP &gt;30d before death</i>                                                                   | 0.829     | 0.817         | 0.842 | <0.0001        |
| <i>ACP in last 30d</i>                                                                            | 3.869     | 3.724         | 4.018 | <0.0001        |
| <b>Age</b>                                                                                        |           |               |       |                |
| <i>65-69</i>                                                                                      | ref       |               |       |                |
| <i>70-74</i>                                                                                      | 0.951     | 0.932         | 0.97  | <0.0001        |
| <i>75-79</i>                                                                                      | 0.907     | 0.89          | 0.925 | <0.0001        |
| <i>80-84</i>                                                                                      | 0.825     | 0.81          | 0.841 | <0.0001        |
| <i>85-89</i>                                                                                      | 0.729     | 0.716         | 0.743 | <0.0001        |
| <i>90-94</i>                                                                                      | 0.642     | 0.63          | 0.655 | <0.0001        |
| <i>95+</i>                                                                                        | 0.539     | 0.528         | 0.551 | <0.0001        |
| <b>Race</b>                                                                                       |           |               |       |                |
| <i>Non-Hispanic White</i>                                                                         | ref       |               |       |                |
| <i>Asian</i>                                                                                      | 1.501     | 1.445         | 1.561 | <0.0001        |
| <i>Hispanic</i>                                                                                   | 1.424     | 1.373         | 1.476 | <0.0001        |
| <i>Non-Hispanic Black</i>                                                                         | 1.34      | 1.32          | 1.362 | <0.0001        |
| <i>Other</i>                                                                                      | 1.147     | 1.108         | 1.188 | <0.0001        |
| <i>Unknown</i>                                                                                    | 1.04      | 0.966         | 1.119 | 0.3028         |
| <b>Sex</b>                                                                                        |           |               |       |                |
| <i>Male</i>                                                                                       | ref       |               |       |                |
| <i>Female</i>                                                                                     | 0.972     | 0.964         | 0.981 | <0.0001        |
| <b>Charlson Comorbidity Score</b>                                                                 |           |               |       |                |
| <i>0</i>                                                                                          | ref       |               |       |                |
| <i>1</i>                                                                                          | 1.345     | 1.281         | 1.413 | <0.0001        |
| <i>2</i>                                                                                          | 1.919     | 1.831         | 2.011 | <0.0001        |
| <i>3</i>                                                                                          | 2.693     | 2.571         | 2.822 | <0.0001        |
| <i>4</i>                                                                                          | 3.562     | 3.401         | 3.731 | <0.0001        |
| <i>5+</i>                                                                                         | 5.948     | 5.687         | 6.221 | <0.0001        |
| <b>HRR Median Medicare Spending Level</b>                                                         |           |               |       |                |
| <i>Medium</i>                                                                                     | ref       |               |       |                |
| <i>Low</i>                                                                                        | 1.148     | 1.137         | 1.159 | <0.0001        |
| <i>High</i>                                                                                       | 0.952     | 0.94          | 0.964 | <0.0001        |
| <b>Dual Eligibility Status</b>                                                                    |           |               |       |                |
| <i>No</i>                                                                                         | ref       |               |       |                |
| <i>Yes</i>                                                                                        | 0.816     | 0.808         | 0.823 | <0.0001        |

| <b>eTable 5. Association Between ACP and Late Hospice Enrollment</b> |           |               |       |                |
|----------------------------------------------------------------------|-----------|---------------|-------|----------------|
|                                                                      | <b>OR</b> | <b>95% CI</b> |       | <b>P value</b> |
| <b>ACP</b>                                                           |           |               |       |                |
| <i>No ACP</i>                                                        | ref       |               |       |                |
| <i>ACP &gt;30d before death</i>                                      | 1.057     | 1.031         | 1.083 | <0.0001        |
| <i>ACP in last 30d</i>                                               | 1.839     | 1.776         | 1.904 | <0.0001        |
| <b>Age</b>                                                           |           |               |       |                |
| <i>65-69</i>                                                         | ref       |               |       |                |
| <i>70-74</i>                                                         | 1.198     | 1.162         | 1.236 | <0.0001        |
| <i>75-79</i>                                                         | 1.351     | 1.311         | 1.391 | <0.0001        |
| <i>80-84</i>                                                         | 1.565     | 1.521         | 1.611 | <0.0001        |
| <i>85-89</i>                                                         | 1.786     | 1.736         | 1.838 | <0.0001        |
| <i>90-94</i>                                                         | 2.01      | 1.952         | 2.07  | <0.0001        |
| <i>95+</i>                                                           | 2.099     | 2.029         | 2.171 | <0.0001        |
| <b>Race</b>                                                          |           |               |       |                |
| <i>Non-Hispanic White</i>                                            | ref       |               |       |                |
| <i>Asian</i>                                                         | 0.572     | 0.537         | 0.609 | <0.0001        |
| <i>Hispanic</i>                                                      | 0.825     | 0.781         | 0.872 | <0.0001        |
| <i>Non-Hispanic Black</i>                                            | 0.563     | 0.548         | 0.577 | <0.0001        |
| <i>Other</i>                                                         | 0.68      | 0.643         | 0.718 | <0.0001        |
| <i>Unknown</i>                                                       | 0.934     | 0.835         | 1.044 | 0.2292         |
| <b>Sex</b>                                                           |           |               |       |                |
| <i>Male</i>                                                          | ref       |               |       |                |
| <i>Female</i>                                                        | 1.113     | 1.098         | 1.128 | <0.0001        |
| <b>Charlson Comorbidity Score</b>                                    |           |               |       |                |
| <i>0</i>                                                             | ref       |               |       |                |
| <i>1</i>                                                             | 3.62      | 3.214         | 4.077 | <0.0001        |
| <i>2</i>                                                             | 4.672     | 4.162         | 5.245 | <0.0001        |
| <i>3</i>                                                             | 5.449     | 4.859         | 6.11  | <0.0001        |
| <i>4</i>                                                             | 6.13      | 5.469         | 6.87  | <0.0001        |
| <i>5+</i>                                                            | 7.98      | 7.132         | 8.93  | <0.0001        |
| <b>HRR Median Medicare Spending Level</b>                            |           |               |       |                |
| <i>Medium</i>                                                        | ref       |               |       |                |
| <i>Low</i>                                                           | 1.053     | 1.037         | 1.068 | <0.0001        |
| <i>High</i>                                                          | 0.747     | 0.732         | 0.762 | <0.0001        |
| <b>Dual Eligibility Status</b>                                       |           |               |       |                |
| <i>No</i>                                                            | ref       |               |       |                |
| <i>Yes</i>                                                           | 0.769     | 0.757         | 0.78  | <0.0001        |

| <b>eTable 6. Association Between ACP and Early Hospice Enrollment</b> |           |               |       |                |
|-----------------------------------------------------------------------|-----------|---------------|-------|----------------|
|                                                                       | <b>OR</b> | <b>95% CI</b> |       | <b>P value</b> |
| <b>ACP</b>                                                            |           |               |       |                |
| <i>No ACP</i>                                                         | ref       |               |       |                |
| <i>ACP &gt;30d before death</i>                                       | 1.333     | 1.312         | 1.354 | <0.0001        |
| <i>ACP in last 30d</i>                                                | 0.852     | 0.826         | 0.878 | <0.0001        |
| <b>Age</b>                                                            |           |               |       |                |
| <i>65-69</i>                                                          | ref       |               |       |                |
| <i>70-74</i>                                                          | 1.204     | 1.18          | 1.229 | <0.0001        |
| <i>75-79</i>                                                          | 1.39      | 1.363         | 1.418 | <0.0001        |
| <i>80-84</i>                                                          | 1.7       | 1.668         | 1.732 | <0.0001        |
| <i>85-89</i>                                                          | 2.017     | 1.979         | 2.055 | <0.0001        |
| <i>90-94</i>                                                          | 2.35      | 2.305         | 2.396 | <0.0001        |
| <i>95+</i>                                                            | 2.599     | 2.543         | 2.657 | <0.0001        |
| <b>Race</b>                                                           |           |               |       |                |
| <i>Non-Hispanic White</i>                                             | ref       |               |       |                |
| <i>Asian</i>                                                          | 0.584     | 0.561         | 0.607 | <0.0001        |
| <i>Hispanic</i>                                                       | 0.848     | 0.818         | 0.879 | <0.0001        |
| <i>Non-Hispanic Black</i>                                             | 0.728     | 0.717         | 0.74  | <0.0001        |
| <i>Other</i>                                                          | 0.675     | 0.652         | 0.7   | <0.0001        |
| <i>Unknown</i>                                                        | 0.873     | 0.809         | 0.943 | 0.0005         |
| <b>Sex</b>                                                            |           |               |       |                |
| <i>Male</i>                                                           | ref       |               |       |                |
| <i>Female</i>                                                         | 1.261     | 1.25          | 1.273 | <0.0001        |
| <b>Charlson Comorbidity Score</b>                                     |           |               |       |                |
| <i>0</i>                                                              | ref       |               |       |                |
| <i>1</i>                                                              | 3.07      | 2.931         | 3.216 | <0.0001        |
| <i>2</i>                                                              | 3.135     | 2.997         | 3.278 | <0.0001        |
| <i>3</i>                                                              | 2.832     | 2.709         | 2.96  | <0.0001        |
| <i>4</i>                                                              | 2.553     | 2.442         | 2.668 | <0.0001        |
| <i>5+</i>                                                             | 2.401     | 2.301         | 2.505 | <0.0001        |
| <b>HRR Median Medicare Spending Level</b>                             |           |               |       |                |
| <i>Medium</i>                                                         | ref       |               |       |                |
| <i>Low</i>                                                            | 0.943     | 0.934         | 0.953 | <0.0001        |
| <i>High</i>                                                           | 0.832     | 0.822         | 0.843 | <0.0001        |
| <b>Dual Eligibility Status</b>                                        |           |               |       |                |
| <i>No</i>                                                             | ref       |               |       |                |
| <i>Yes</i>                                                            | 0.853     | 0.844         | 0.861 | <0.0001        |

| <b>eTable 7. Association Between ACP and Expenditure in the Last 30 Days of Life by HRR Median Medicare Spending Level</b> |                        |               |          |                |
|----------------------------------------------------------------------------------------------------------------------------|------------------------|---------------|----------|----------------|
| <b>HRR Median Medicare Spending Level = Low</b>                                                                            |                        |               |          |                |
|                                                                                                                            | <b>Mean Difference</b> | <b>95% CI</b> |          | <b>P value</b> |
| <b>ACP</b>                                                                                                                 |                        |               |          |                |
| <i>No ACP</i>                                                                                                              | ref                    |               |          |                |
| <i>ACP &gt;30d before death</i>                                                                                            | 7941.89                | 7231.36       | 8652.42  | <.0001         |
| <i>ACP in last 30d</i>                                                                                                     | -281.45                | -695.06       | 132.16   | 0.1823         |
| <b>Age</b>                                                                                                                 |                        |               |          |                |
| <i>65-69</i>                                                                                                               | ref                    |               |          |                |
| <i>70-74</i>                                                                                                               | -2375.22               | -2903.23      | -1847.22 | <.0001         |
| <i>75-79</i>                                                                                                               | -3861.58               | -4371         | -3352.15 | <.0001         |
| <i>80-84</i>                                                                                                               | -6888.64               | -7381.39      | -6395.89 | <.0001         |
| <i>85-89</i>                                                                                                               | -9248.52               | -9731.99      | -8765.05 | <.0001         |
| <i>90-94</i>                                                                                                               | -11011                 | -11507        | -10515   | <.0001         |
| <i>95+</i>                                                                                                                 | -11696                 | -12251        | -11141   | <.0001         |
| <b>Race</b>                                                                                                                |                        |               |          |                |
| <i>Asian</i>                                                                                                               | ref                    |               |          |                |
| <i>Hispanic</i>                                                                                                            | -516.97                | -1777.62      | 743.68   | 0.4215         |
| <i>Non-Hispanic Black</i>                                                                                                  | -1467.93               | -2488.95      | -446.9   | 0.0048         |
| <i>Other</i>                                                                                                               | -2949.43               | -3898.4       | -2000.45 | <.0001         |
| <i>Unknown</i>                                                                                                             | -3644.12               | -5559         | -1729.25 | 0.0002         |
| <i>Non-Hispanic White</i>                                                                                                  | -7124.45               | -7868.12      | -6380.78 | <.0001         |
| <b>Sex</b>                                                                                                                 |                        |               |          |                |
| <i>Female</i>                                                                                                              | ref                    |               |          |                |
| <i>Male</i>                                                                                                                | 275.72                 | 44.8294       | 506.61   | 0.0193         |
| <b>Charlson Comorbidity Score</b>                                                                                          |                        |               |          |                |
| <i>0</i>                                                                                                                   | ref                    |               |          |                |
| <i>1</i>                                                                                                                   | 3212.37                | 1984.43       | 4440.32  | <.0001         |
| <i>2</i>                                                                                                                   | 5029.91                | 3841.02       | 6218.8   | <.0001         |
| <i>3</i>                                                                                                                   | 7039.78                | 5863.94       | 8215.63  | <.0001         |
| <i>4</i>                                                                                                                   | 8563.57                | 7392.55       | 9734.6   | <.0001         |
| <i>5+</i>                                                                                                                  | 12905                  | 11772         | 14039    | <.0001         |
| <b>Dual Eligibility Status</b>                                                                                             |                        |               |          |                |
| <i>No</i>                                                                                                                  | ref                    |               |          |                |
| <i>Yes</i>                                                                                                                 | -2445.01               | -2695.94      | -2194.09 | <.0001         |
|                                                                                                                            |                        |               |          |                |
| <b>HRR Median Medicare Spending Level= Medium</b>                                                                          |                        |               |          |                |
|                                                                                                                            | <b>Mean Difference</b> | <b>95% CI</b> |          | <b>P value</b> |
| <b>ACP</b>                                                                                                                 |                        |               |          |                |
| <i>No ACP</i>                                                                                                              | ref                    |               |          |                |



|                                                  |                        |               |          |                |
|--------------------------------------------------|------------------------|---------------|----------|----------------|
| <i>ACP &gt;30d before death</i>                  | 7930.64                | 7572.59       | 8288.68  | <.0001         |
| <i>ACP in last 30d</i>                           | 245.35                 | 45.8168       | 444.89   | 0.016          |
| <b>Age</b>                                       |                        |               |          |                |
| <i>65-69</i>                                     | ref                    |               |          |                |
| <i>70-74</i>                                     | -2044.13               | -2294.28      | -1793.98 | <.0001         |
| <i>75-79</i>                                     | -3693.34               | -3934.84      | -3451.84 | <.0001         |
| <i>80-84</i>                                     | -6478.35               | -6713.44      | -6243.26 | <.0001         |
| <i>85-89</i>                                     | -8490.47               | -8722.04      | -8258.9  | <.0001         |
| <i>90-94</i>                                     | -10143                 | -10381        | -9904.06 | <.0001         |
| <i>95+</i>                                       | -11186                 | -11458        | -10915   | <.0001         |
| <b>Race</b>                                      |                        |               |          |                |
| <i>Asian</i>                                     | ref                    |               |          |                |
| <i>Hispanic</i>                                  | -3823.96               | -4653.41      | -2994.51 | <.0001         |
| <i>Non-Hispanic Black</i>                        | -5800.66               | -6439.07      | -5162.24 | <.0001         |
| <i>Other</i>                                     | -5634.27               | -6437.76      | -4830.78 | <.0001         |
| <i>Unknown</i>                                   | -8630.32               | -9797.73      | -7462.92 | <.0001         |
| <i>Non-Hispanic White</i>                        | -9834.6                | -10452        | -9216.9  | <.0001         |
| <b>Sex</b>                                       |                        |               |          |                |
| <i>Female</i>                                    | ref                    |               |          |                |
| <i>Male</i>                                      | 387.33                 | 273.79        | 500.88   | <.0001         |
| <b>Charlson Comorbidity Score</b>                |                        |               |          |                |
| <i>0</i>                                         | ref                    |               |          |                |
| <i>1</i>                                         | 3082.02                | 2432.26       | 3731.79  | <.0001         |
| <i>2</i>                                         | 4614.22                | 3987.25       | 5241.18  | <.0001         |
| <i>3</i>                                         | 6471.74                | 5851.01       | 7092.47  | <.0001         |
| <i>4</i>                                         | 8117.91                | 7499.79       | 8736.03  | <.0001         |
| <i>5+</i>                                        | 13086                  | 12487         | 13685    | <.0001         |
| <b>Dual Eligibility Status</b>                   |                        |               |          |                |
| <i>No</i>                                        | ref                    |               |          |                |
| <i>Yes</i>                                       | -2422.73               | -2545.79      | -2299.68 | <.0001         |
|                                                  |                        |               |          |                |
| <b>HRR Median Medicare Spending Level = High</b> |                        |               |          |                |
|                                                  | <b>Mean Difference</b> | <b>95% CI</b> |          | <b>P value</b> |
| <b>ACP</b>                                       |                        |               |          |                |
| <i>No ACP</i>                                    | ref                    |               |          |                |
| <i>ACP &gt;30d before death</i>                  | 10166                  | 9615.28       | 10717    | <.0001         |
| <i>ACP in last 30d</i>                           | 1410.64                | 1116.82       | 1704.46  | <.0001         |
| <b>Age</b>                                       |                        |               |          |                |
| <i>65-69</i>                                     | ref                    |               |          |                |
| <i>70-74</i>                                     | -1461.6                | -1853.76      | -1069.44 | <.0001         |
| <i>75-79</i>                                     | -3535.6                | -3913.74      | -3157.46 | <.0001         |

|                                   |          |          |          |        |
|-----------------------------------|----------|----------|----------|--------|
| <i>80-84</i>                      | -5856.55 | -6223.68 | -5489.42 | <.0001 |
| <i>85-89</i>                      | -7968.46 | -8329.66 | -7607.26 | <.0001 |
| <i>90-94</i>                      | -9933.27 | -10305   | -9561.71 | <.0001 |
| <i>95+</i>                        | -10979   | -11400   | -10557   | <.0001 |
| <b>Race</b>                       |          |          |          |        |
| <i>Asian</i>                      | ref      |          |          |        |
| <i>Hispanic</i>                   | -4489.41 | -5323.02 | -3655.81 | <.0001 |
| <i>Non-Hispanic Black</i>         | -6321.08 | -7020.73 | -5621.44 | <.0001 |
| <i>Other</i>                      | -5303.61 | -6260.55 | -4346.68 | <.0001 |
| <i>Unknown</i>                    | -6402.8  | -7944.14 | -4861.46 | <.0001 |
| <i>Non-Hispanic White</i>         | -10187   | -10850   | -9524.2  | <.0001 |
| <b>Sex</b>                        |          |          |          |        |
| <i>Female</i>                     | ref      |          |          |        |
| <i>Male</i>                       | 979.45   | 803.17   | 1155.72  | <.0001 |
| <b>Charlson Comorbidity Score</b> |          |          |          |        |
| <i>0</i>                          | ref      |          |          |        |
| <i>1</i>                          | 2767.48  | 1758.82  | 3776.13  | <.0001 |
| <i>2</i>                          | 4767.75  | 3794.28  | 5741.22  | <.0001 |
| <i>3</i>                          | 6625.4   | 5662.11  | 7588.69  | <.0001 |
| <i>4</i>                          | 8834.09  | 7875.23  | 9792.96  | <.0001 |
| <i>5+</i>                         | 15345    | 14418    | 16271    | <.0001 |
| <b>Dual Eligibility Status</b>    |          |          |          |        |
| No                                | ref      |          |          |        |
| Yes                               | -1037.69 | -1224.9  | -850.48  | <.0001 |

| <b>eTable 8. Health Care Utilization at the End of Life by FFS Medicare Beneficiaries in SI Cohort Who Died in 2017 or 2018*</b> |              |                |               |                |                                  |                |                         |                |                |
|----------------------------------------------------------------------------------------------------------------------------------|--------------|----------------|---------------|----------------|----------------------------------|----------------|-------------------------|----------------|----------------|
|                                                                                                                                  | <b>Total</b> | <b>% or SD</b> | <b>No ACP</b> | <b>% or SD</b> | <b>ACP &gt; 30d before death</b> | <b>% or SD</b> | <b>ACP in last 30 d</b> | <b>% or SD</b> | <b>P value</b> |
| <b>Total N</b>                                                                                                                   | 955,777      | 100.00%        | 851,842       | 89.10%         | 81,131                           | 8.50%          | 22,804                  | 2.40%          |                |
| <b>In Hospital Death</b>                                                                                                         |              |                |               |                |                                  |                |                         |                |                |
| No                                                                                                                               | 729,283      | 76.30%         | 649,852       | 76.30%         | 63,487                           | 78.30%         | 15,944                  | 69.90%         | <0.0001        |
| Yes                                                                                                                              | 226,494      | 23.70%         | 201,990       | 23.70%         | 17,644                           | 21.70%         | 6,860                   | 30.10%         |                |
| <b>Total N</b>                                                                                                                   | 955,777      | 100.00%        | 851,842       | 100.00%        | 81,131                           | 100.00%        | 22,804                  | 100.00%        |                |
| <b>Hospital Admission, last 30 days</b>                                                                                          |              |                |               |                |                                  |                |                         |                |                |
| No                                                                                                                               | 446,252      | 46.70%         | 403,133       | 47.30%         | 40,147                           | 49.50%         | 2,972                   | 13.00%         | <0.0001        |
| Yes                                                                                                                              | 509,525      | 53.30%         | 448,709       | 52.70%         | 40,984                           | 50.50%         | 19,832                  | 87.00%         |                |
| <b>Total N</b>                                                                                                                   | 955,777      | 100.00%        | 851,842       | 100.00%        | 81,131                           | 100.00%        | 22,804                  | 100.00%        |                |
| <b>ICU admission, last 30 days</b>                                                                                               |              |                |               |                |                                  |                |                         |                |                |
| No                                                                                                                               | 759,690      | 79.50%         | 678,166       | 79.60%         | 65,815                           | 81.10%         | 15,709                  | 68.90%         | <0.0001        |
| Yes                                                                                                                              | 196,087      | 20.50%         | 173,676       | 20.40%         | 15,316                           | 18.90%         | 7,095                   | 31.10%         |                |
| <b>Total N</b>                                                                                                                   | 955,777      | 100.00%        | 851,842       | 100.00%        | 81,131                           | 100.00%        | 22,804                  | 100.00%        |                |
| <b>ED visit, last 30 days</b>                                                                                                    |              |                |               |                |                                  |                |                         |                |                |
| No                                                                                                                               | 404,713      | 42.30%         | 364,486       | 42.80%         | 36,960                           | 45.60%         | 3,267                   | 14.30%         | <0.0001        |
| Yes                                                                                                                              | 551,064      | 57.70%         | 487,356       | 57.20%         | 44,171                           | 54.40%         | 19,537                  | 85.70%         |                |
| <b>Total N</b>                                                                                                                   | 955,777      | 100.00%        | 851,842       | 100.00%        | 81,131                           | 100.00%        | 22,804                  | 100.00%        |                |
| <b>Timing of Hospice Referral</b>                                                                                                |              |                |               |                |                                  |                |                         |                |                |
| No Hospice                                                                                                                       | 418,499      | 43.80%         | 377,607       | 44.30%         | 31,236                           | 38.50%         | 9,656                   | 42.30%         | <0.0001        |
| Hospice ≥ 4 days before death                                                                                                    | 418,983      | 43.80%         | 370,536       | 43.50%         | 40,574                           | 50.00%         | 7,873                   | 34.50%         |                |
| Hospice < 4 days before death                                                                                                    | 118,295      | 12.40%         | 103,699       | 12.20%         | 9,321                            | 11.50%         | 5,275                   | 23.10%         |                |

|                                                                                          |          |          |          |          |          |          |          |          |         |
|------------------------------------------------------------------------------------------|----------|----------|----------|----------|----------|----------|----------|----------|---------|
| <b>Total N</b>                                                                           | 955,777  | 100.00%  | 851,842  | 100.00%  | 81,131   | 100.00%  | 22,804   | 100.00%  |         |
| <b>EOL Expenditure in the last 30 days</b>                                               |          |          |          |          |          |          |          |          |         |
| Mean (SD)                                                                                | \$17,481 | \$22,029 | \$17,141 | \$21,876 | \$18,205 | \$22,785 | \$27,187 | \$24,742 | <0.0001 |
|                                                                                          |          |          |          |          |          |          |          |          |         |
| <b>Total N</b>                                                                           | 929,502  |          | 827,325  |          | 79,376   |          | 22,804   |          |         |
| <b>EOL Expenditure in the last 30 d stratified by HRR Median Medicare Spending Level</b> |          |          |          |          |          |          |          |          |         |
| Mean, SD (HRR Level=Low)                                                                 | \$16,332 | \$22,010 | \$16,082 | \$21,837 | \$16,196 | \$22,991 | \$25,441 | \$24,673 | <0.0001 |
| Mean, SD (HRR Level=Medium)                                                              | \$16,582 | \$20,878 | \$16,296 | \$20,797 | \$16,986 | \$21,127 | \$25,802 | \$22,922 | <0.0001 |
| Mean, SD (HRR Level=High)                                                                | \$19,703 | \$23,867 | \$19,244 | \$23,644 | \$21,508 | \$24,943 | \$31,059 | \$27,404 | <0.0001 |
|                                                                                          |          |          |          |          |          |          |          |          |         |
| <b>Total N</b>                                                                           | 929,502  |          | 827,325  |          | 79,376   |          | 22,804   |          |         |
|                                                                                          |          |          |          |          |          |          |          |          |         |
| ACP: Advance Care Planning                                                               |          |          |          |          |          |          |          |          |         |
| FFS: Fee For Service                                                                     |          |          |          |          |          |          |          |          |         |
| SI: Seriously Ill                                                                        |          |          |          |          |          |          |          |          |         |
| HRR: Hospital Referral Region                                                            |          |          |          |          |          |          |          |          |         |

**eTable 9. Adjusted Odds Ratios for Healthcare Utilization in Last 30 Days of Life Using 1:1 Propensity Score Matched—Beneficiaries\***

|                                                                                                                                                        | aOR     | 95% CI          | pvalue        |
|--------------------------------------------------------------------------------------------------------------------------------------------------------|---------|-----------------|---------------|
| <b>In Hospital Death</b>                                                                                                                               |         |                 |               |
| No ACP                                                                                                                                                 | ref     |                 |               |
| Yes ACP before last 30d                                                                                                                                | 0.86    | 80.84-0.88      | <0.0001       |
| <b>Admission in the last 30 d</b>                                                                                                                      |         |                 |               |
| No ACP                                                                                                                                                 | ref     |                 |               |
| Yes ACP before last 30d                                                                                                                                | 0.82    | 0.80-0.84       | <0.0001       |
| <b>ICU visit in the last 30 d</b>                                                                                                                      |         |                 |               |
| No ACP                                                                                                                                                 | ref     |                 |               |
| Yes ACP before last 30d                                                                                                                                | 0.86    | 0.84-0.88       | <0.0001       |
| <b>ED visit in the last 30 d</b>                                                                                                                       |         |                 |               |
| No ACP                                                                                                                                                 | ref     |                 |               |
| Yes ACP before last 30d                                                                                                                                | 0.81    | 0.80-0.83       | <0.0001       |
| <b>Late Hospice Referral</b>                                                                                                                           |         |                 |               |
| No ACP                                                                                                                                                 | ref     |                 |               |
| Yes ACP before last 30d                                                                                                                                | 0.99    | 0.96-1.04       | 0.76          |
| <b>Total N</b>                                                                                                                                         | 161,672 |                 |               |
| *all models adjusted for sex, age group, race/eth, CCI score, HRR cost class and dual eligibility status, using propensity score matched beneficiaries |         |                 |               |
| <b>Mean Difference in Expenditure</b>                                                                                                                  |         | <b>95% CI</b>   | <b>pvalue</b> |
| No ACP                                                                                                                                                 | ref     |                 |               |
| Yes ACP before last 30d                                                                                                                                | \$565   | (\$356-\$773)   | <0.0001       |
| <b>Total N</b>                                                                                                                                         | 161,672 |                 |               |
| <b>Mean Difference in Expenditure</b>                                                                                                                  |         | <b>95% CI</b>   | <b>pvalue</b> |
| <b>HRR Median Medicare Spending Level =Low</b>                                                                                                         |         |                 |               |
| No ACP                                                                                                                                                 | ref     |                 |               |
| Yes ACP before last 30d                                                                                                                                | -\$268  | (\$-817-\$282)  | 0.33          |
| <b>HRR Median Medicare Spending Level =Medium</b>                                                                                                      |         |                 |               |
| No ACP                                                                                                                                                 | ref     |                 |               |
| Yes ACP before last 30d                                                                                                                                | \$226   | (\$-44-\$495)   | 0.10          |
| <b>HRR Median Medicare Spending Level=High</b>                                                                                                         |         |                 |               |
| No ACP                                                                                                                                                 | ref     |                 |               |
| Yes ACP before last 30d                                                                                                                                | \$1,468 | (\$1073-\$1864) | <0.0001       |

|                                                                                                                                                                                                            |         |  |  |
|------------------------------------------------------------------------------------------------------------------------------------------------------------------------------------------------------------|---------|--|--|
| <b>Total N</b>                                                                                                                                                                                             | 161,672 |  |  |
| *Bonferroni Corrected P =0.008, for multiple 6 pairwise comparisons                                                                                                                                        |         |  |  |
| *expenditure stratified by Median Medicare Spending Level by HRR, class models adjusted for sex, age group, race/eth, CCI score, and dual eligibility status, using propensity score matched beneficiaries |         |  |  |
| PS match = 99.6% match                                                                                                                                                                                     |         |  |  |

**eFigure. Overlap of Propensity Scores in Seriously Ill Patients Before Matching**

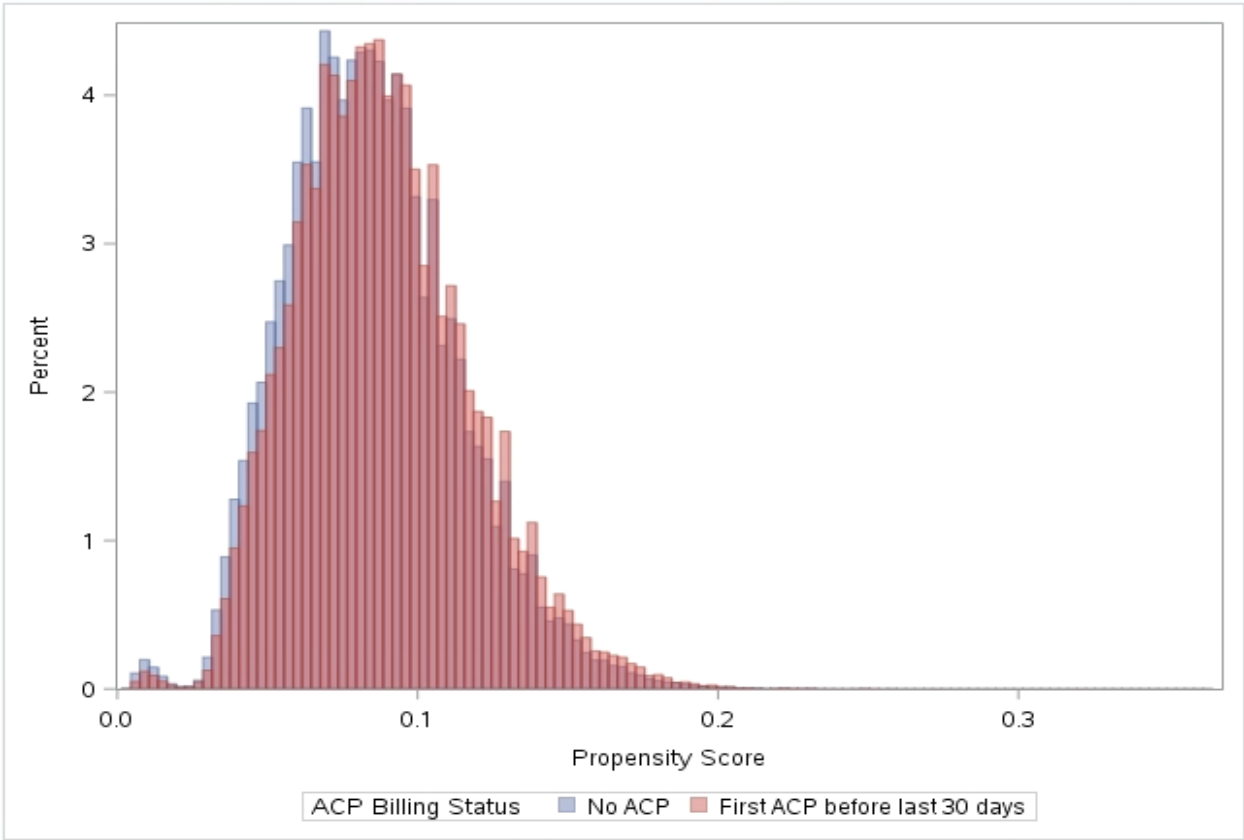

Supplement: jamahealthforum-e211829-s001.pdf [file jamahealthforum-e211829-s001.pdf]
